# Supplementary material
Source: MDPI journal article supplement (https://www.mdpi.com/2073-4395/10/10/1542)

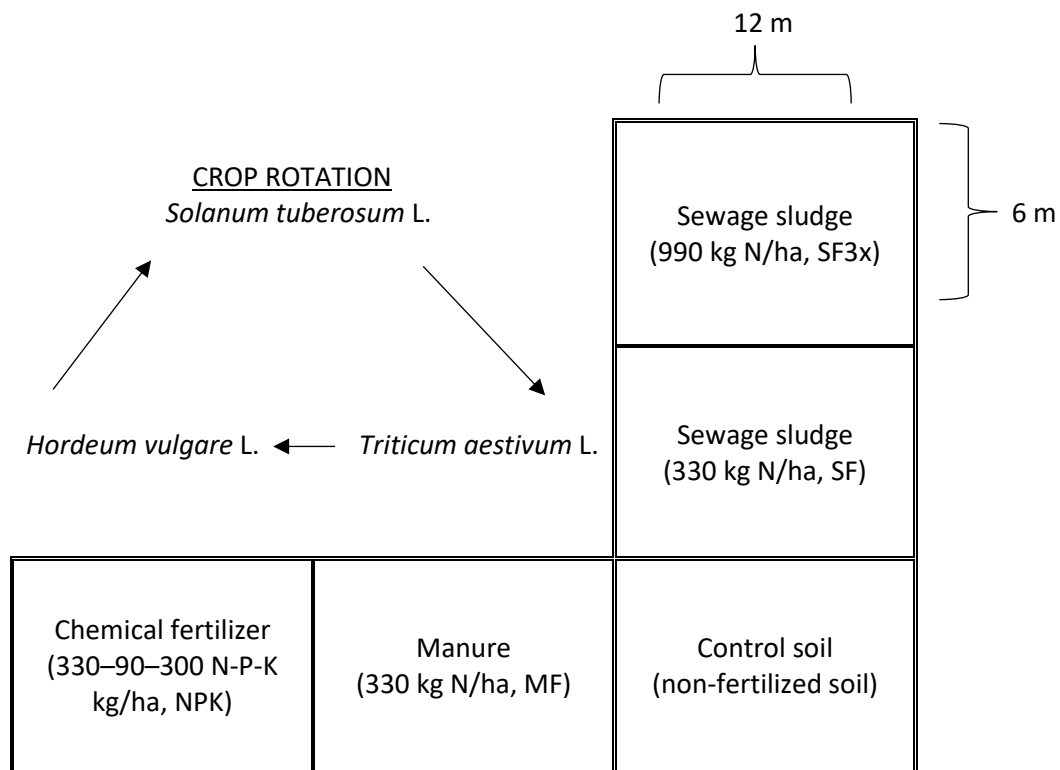

**Figure S2:** Experimental design of experimental field.

Supplement: s1 [file s1]
